# Supplementary material for: MoS2 nanosheets grown on hollow carbon spheres as a strong polysulfide anchor for high performance lithium sulfur batteries
Source: Royal Society of Chemistry journal article supplement (doi:10.1039/d0nr05727d), 2020-01-01
Supplement: d0nr05727d1.pdf [file d0nr05727d1.pdf]

# MoS<sub>2</sub> Nanosheets Grown on Hollow Carbon Spheres as Strong Polysulfide Anchor for High Performance Lithium Sulfur Batteries

*Miaoran Li, Huiyuan Peng, Yang Pei, Fang Wang, Ying Zhu, Ruyue Shi, Xuexia He,*

*Zhibin Lei, Zonghuai Liu and Jie Sun\**

Key Laboratory of Applied Surface and Colloid Chemistry (MOE), Shaanxi Key Laboratory for Advanced Energy Devices, Shaanxi Engineering Laboratory for Advanced Energy Technology, School of Materials Science and Engineering, Shaanxi Normal University, 620 West Chang'an Street, Xi'an, Shaanxi 710119, China.

## Supplementary Materials

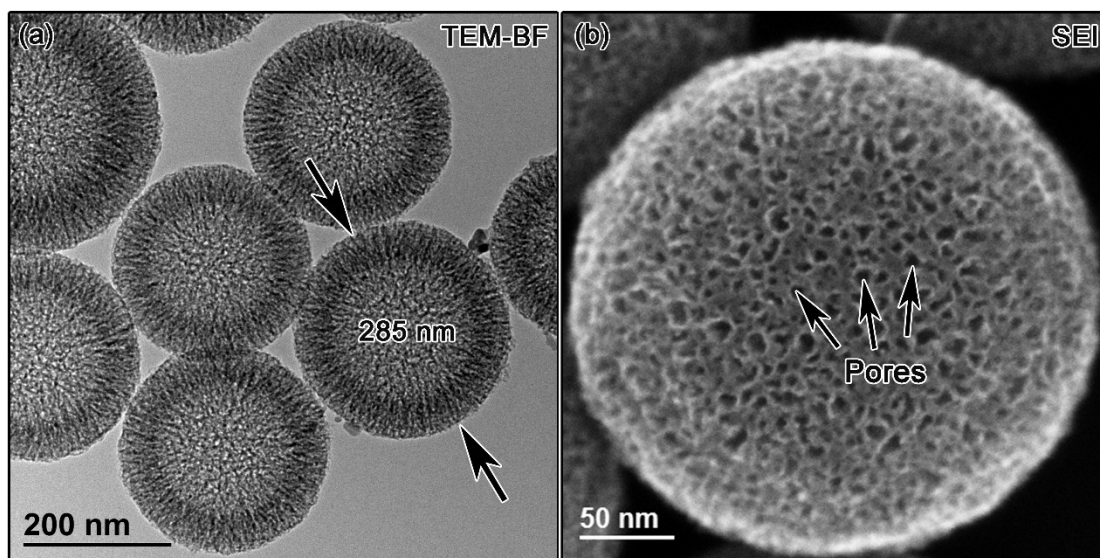

**Figure S1** TEM BF (a) image and SEI (b) of HCS illustrates the detailed morphology and pore structure.

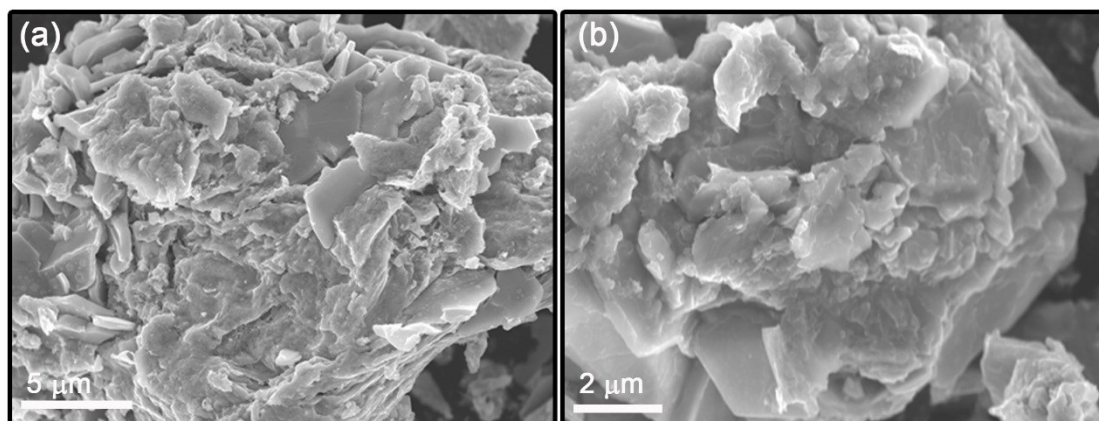

**Figure S2** SEM images of pure MoS<sub>2</sub> nanosheets.

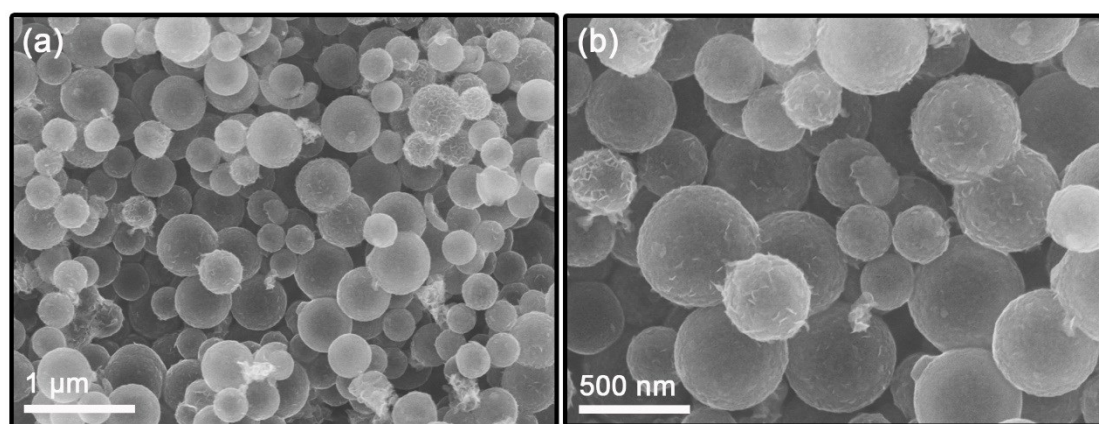

**Figure S3** SEM images of MoS<sub>2</sub>@HCS nanocomposites with smaller pore size of HCS.

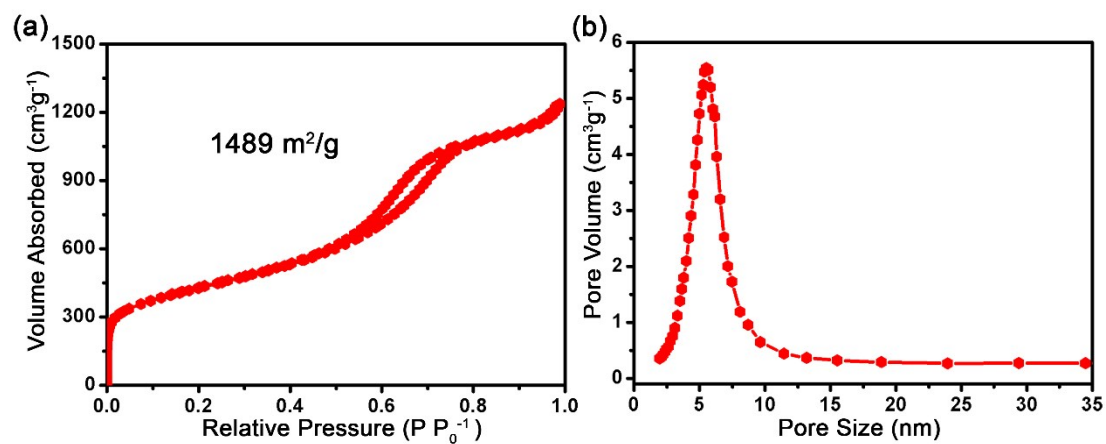

**Figure S4** The N<sub>2</sub> isothermal adsorption (a) and pore size distribution curve (b) of HCS show the 1489 m<sup>2</sup>/g BET specific surface area and 5.6 nm average pore size.

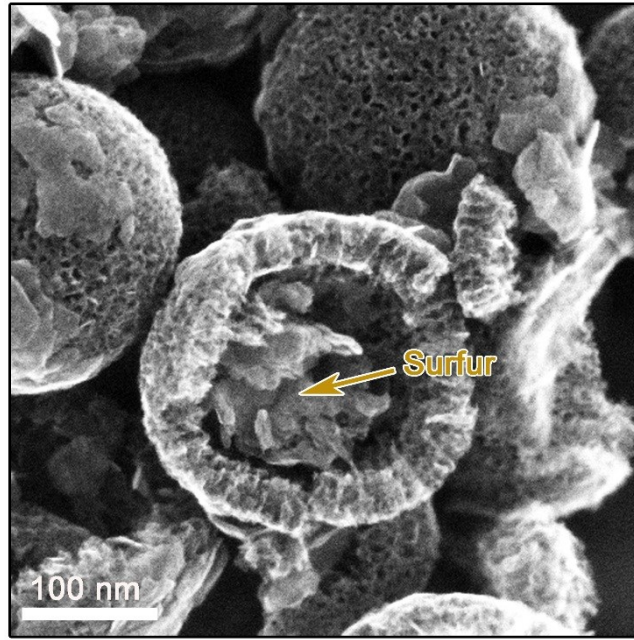

**Figure S5** High resolution SEM image of MoS<sub>2</sub>@HCS/S cathodes.

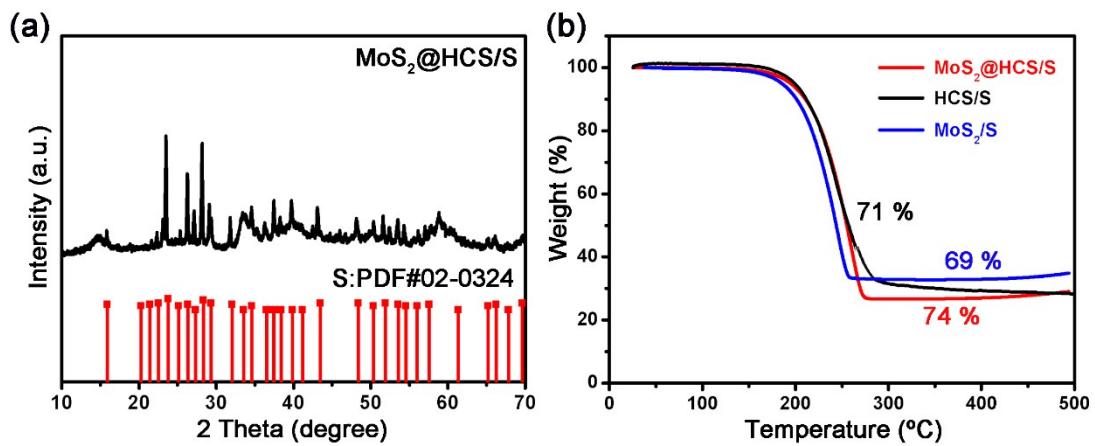

**Figure S6** The XRD spectrum (a) of the as prepared MoS<sub>2</sub>@HCS/S electrodes suggests the successful loading of sulfur. The TG curve (b) illustrates the 74%, 71% and 69% of sulfur loading amount for MoS<sub>2</sub>@HCS/S, HCS/S and MoS<sub>2</sub>/S electrodes.

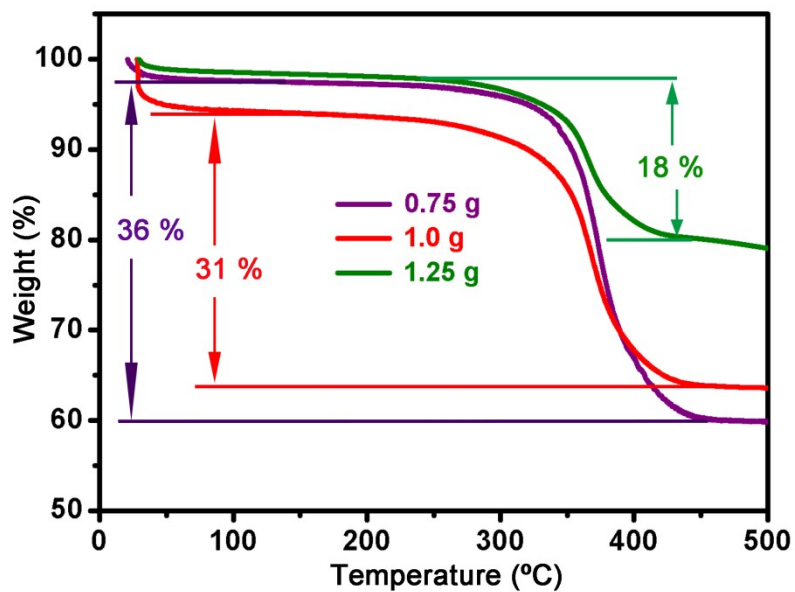

**Figure S7** TGA curves of MoS<sub>2</sub>@HCS nanocomposites with different MoS<sub>2</sub> growth amount.

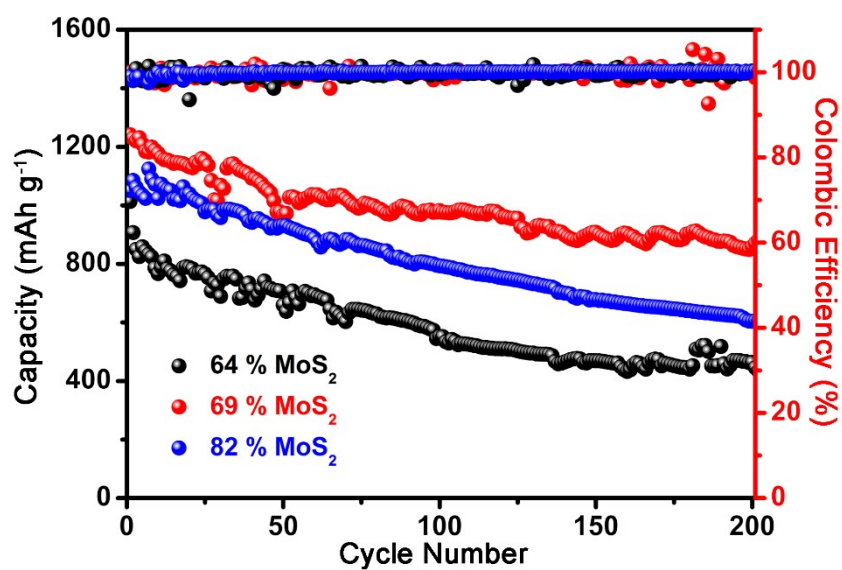

**Figure S8** The cycling performance of MoS<sub>2</sub>@HCS/S cathodes with different MoS<sub>2</sub> growth amount under the current density of 0.5 C.

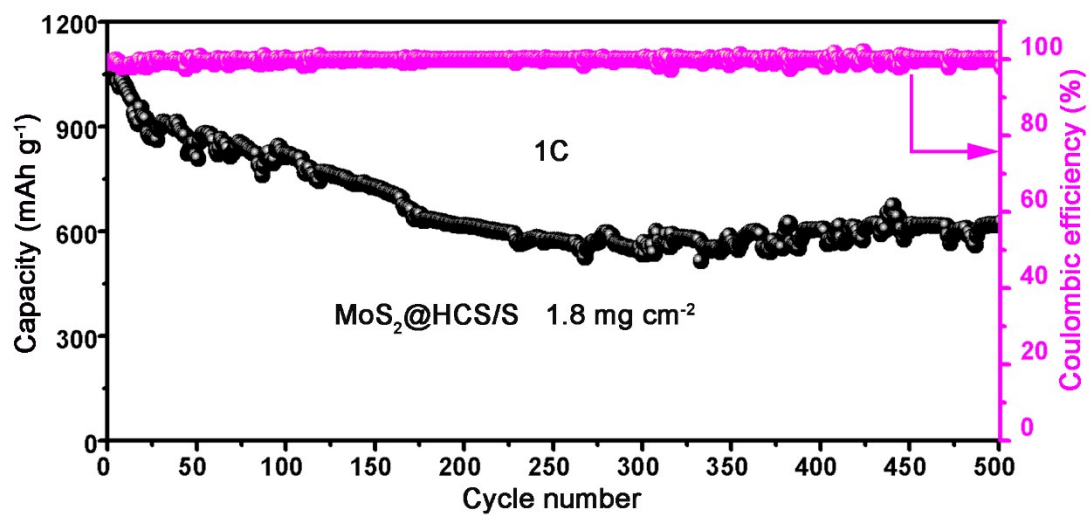

**Figure S9** The cycling performance of MoS<sub>2</sub>@HCS/S electrodes at the current density of 1C and the sulfur loading of 1.8 mg·cm<sup>-1</sup>.

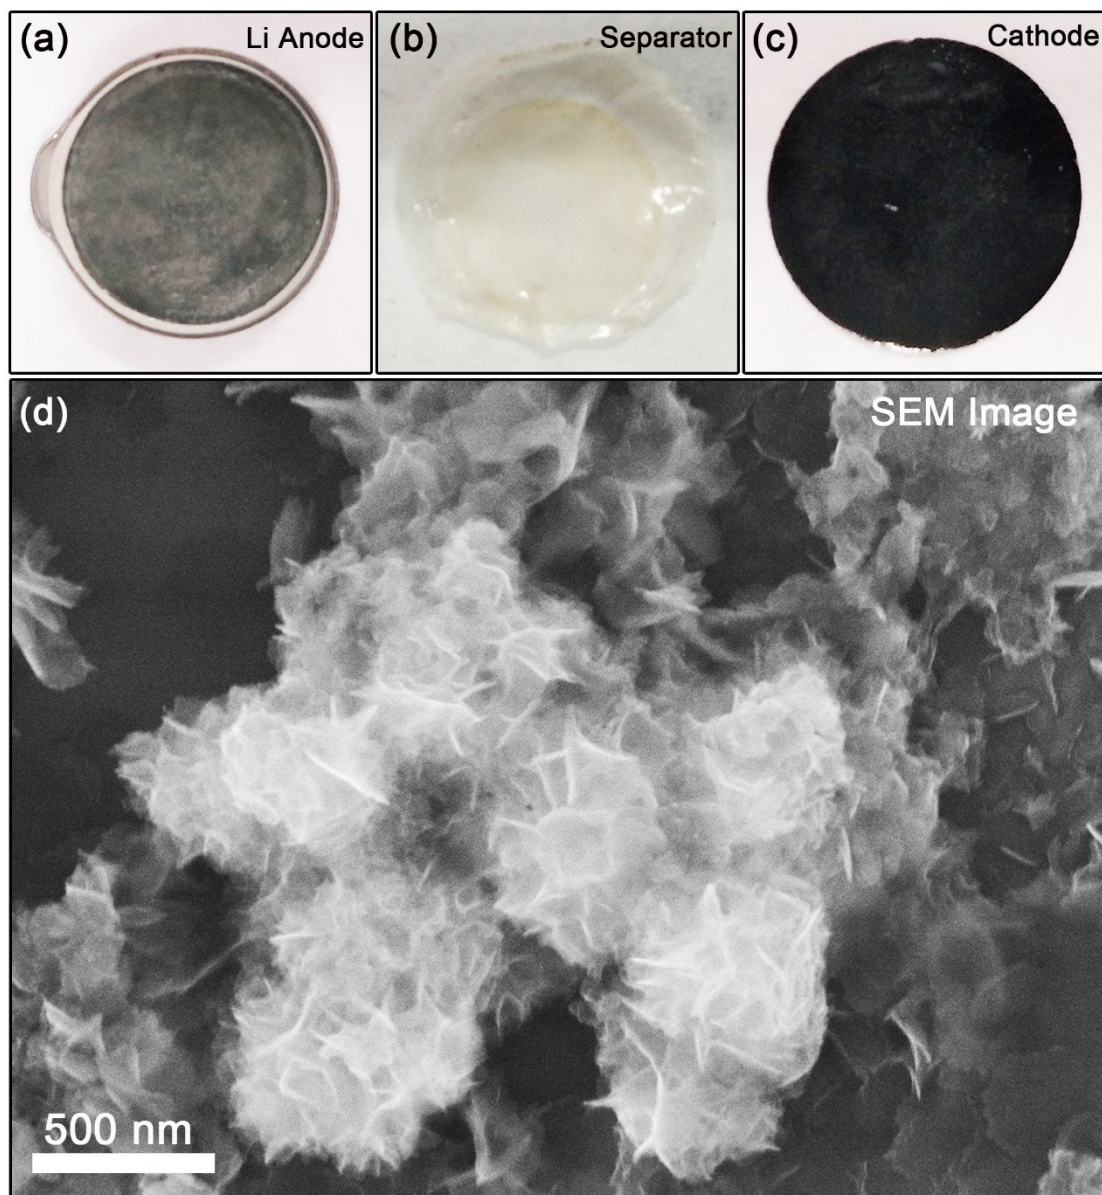

**Figure S10** The digital photographs of (a) Li anode, (b) separator and (c) cathode after 500 cycles illustrate no obvious yellow color. The SEM image (d) suggests the excellent morphology retention of MoS<sub>2</sub>@HCS/S electrodes.
